# Supplementary material for: Acetylcholine modulates prefrontal outcome coding during threat learning under uncertainty
Source: eLife. 2025 Mar 5;13:RP102986. doi: 10.7554/eLife.102986 (PMC11882142; doi:10.7554/eLife.102986)
Supplement: Figure 1—source data 1. — Data for panel D. [file elife-102986-fig1-data1.xlsx]

## Sheet: Sheet1
Fig 1D		T5	P1	P2	P3	P4	P5	R1	R2	R3	R4	R5
ChrimsonR	M03	44.1176	62.5	68.1818	72.5	67.2414	58.0645	62.5	41.0256	56.6667	40.9091	40.9091
	M04	44.7761	50	51.9231	62.5	57.4074	77.4194	73.6842	63.4921	75.7576	55.7143	61.9048
	M05	48.6111	65.625	80.6452	86.7925	59.6154	80.8824	71.2121	64.9351	61.1111	58.8235	60
	M09	38.806	64.1026	73.6111	68.5714	79.1667	75.3623	68	61.1111	66.129	60.6061	55.2632
	M12	60.6061	70	64.7059	86.9565	89.6552	76.9231	71.7391	71.4286	70.8333	67.8571	51.7241
	M13	52.9412	52.9412	66.6667	58.3333	63.8889	57.1429	54.5455	54.5455	50	57.1429	46
No opsin	M07	35.4839	60	72.7273	83.3333	88	91.1111	81.8182	71.4286	74.4186	78.3784	70.3704
	M10	44.4444	63.8889	83.3333	69.5652	90	80.597	91.1765	73.1707	84.6154	70	69.2308
	M14	47.7273	43.75	58.8235	63.1579	71.1538	62.2222	53.7037	51.9231	48.6486	54	44.6809
	M15	38.806	40	63.6364	63.6364	83.3333	90.3226	85.1852	95.8333	66.6667	65.7143	56.4103
