# Supplementary material for: Acetylcholine modulates prefrontal outcome coding during threat learning under uncertainty
Source: eLife. 2025 Mar 5;13:RP102986. doi: 10.7554/eLife.102986 (PMC11882142; doi:10.7554/eLife.102986)
Supplement: Figure 1—source data 2. — The speed was averaged over a 500-ms window before the threat site entry. Data for panel F. [file elife-102986-fig1-data2.xlsx]

## Sheet: Sheet1
Fig 1F	Path type	Mouse ID	PT5	P1	P2	P3	P4	P5
ChrimsonR	Low threat path	M03	18.6272	21.5609	16.7779	22.4085	29.9764	25.9039
		M04	21.1815	10.9007	17.2096	10.9263	19.0942	19.6326
		M05	29.1457	19.444	20.6416	18.2883	20.0474	32.7098
		M09	25.4746	17.3822	17.7766	21.0582	20.9765	24.2386
		M12	29.0331	32.1323	29.3014	33.8403	35.5306	44.1701
		M13	13.2804	24.622	37.0153	39.7515	34.4351	50.7607
			PT5	P1	P2	P3	P4	P5
	High threat path	M03	18.7091	12.476	13.8045	12.2306	21.9028	16.5862
		M04	18.4561	12.444	12.9528	11.6447	14.2616	12.6467
		M05	27.0081	15.2756	9.91036	10.5985	15.1238	18.277
		M09	14.1926	16.9166	15.5747	19.0055	17.8927	21.8902
		M12	25.1784	19.6369	35.0501	12.6235	18.8788	42.5463
		M13	20.7723	27.0627	47.6523	43.6232	43.9874	49.3802
No opsin			PT5	P1	P2	P3	P4	P5
	Low threat path	M07	19.7335	22.9358	38.2203	42.6095	25.3257	27.367
		M10	25.0468	14.2043	24.6517	23.0109	25.4674	33.7963
		M14	23.1985	34.6687	18.7932	26.9091	26.253	30.0208
		M15	18.7879	16.8475	29.7976	51.3871	21.3588	28.1553
			PT5	P1	P2	P3	P4	P5
	High threat path	M07	14.2163	21.9632	9.23246	10.7015	13.864	11.1532
		M10	20.5609	24.3623	12.1024	16.7815	7.32476	15.2593
		M14	26.4316	11.2329	7.24781	10.9372	16.2075	19.0441
		M15	13.4637	13.9357	8.0805	34.6041	11.0788	11.892
