# Supplementary material for: Acetylcholine modulates prefrontal outcome coding during threat learning under uncertainty
Source: eLife. 2025 Mar 5;13:RP102986. doi: 10.7554/eLife.102986 (PMC11882142; doi:10.7554/eLife.102986)
Supplement: Figure 5—source data 1. — Data for panel D. [file elife-102986-fig5-data1.xlsx]

## Sheet: Sheet1
Fig 5 Cb	Mouse ID	T5	P1	P2	P3	P4	P5
ChR2	CH01	51.4286	58.5366	61.9048	46.6667	50.9434	59.1837
	CH02	50	52.1739	60.4651	49.1525	51.3514	53.4884
	CH03	54.2857	63.1579	57.1429	66.6667	58.0645	58.3333
	CH04	33.3333	70.56	55.56	80	92.3077	86.6667
	CH05	48.8889	56	51.1111	50	51.0638	51.282
	CH06	43.75	50	58.1395	47.8261	53.5714	52.6316
	CH07	46.5116	72.973	60	60	50	56.25
	CH08	52.2727	37.1429	52	46.5116	52.2727	75
	CH09	55.1282	44.6809	57.1429	54	52.6316	48.3871
	CH10	56.5217	50	56.5217	60	75.6757	65.7143
ChrimsonR	CR01	44.1176	70	66.6667	66.6667	53.8462	68.4211
	CR02	37.5	57.1429	66.6667	50	50	57.1429
	CR03	50	68.75	50	54.5455	50	50
	CR04	47.2222	62.5	54.5455	100	80	66.6667
	CR05	53.8462	46.1538	57.1429	55.5556	71.4286	87.5
	CR06	52.6316	55.5556	66.6667	40	70	57.1429
	CR07	55.5556	57.1429	50	45.4545	61.5385	69.5652
	CR08	47.0588	45.45	80	68.75	50	100
No-opsin	TD01	50	76.4706	90	100	88.8889	95.4545
	TD02	60	47.3684	55.5556	65.7143	62.069	77.4194
	TD03	47.8261	62.5	100	83.3333	100	100
	TD04	56.6667	56.25	63.6364	56.25	93.3333	83.3333
	TD05	56	47.8261	53.8462	70.5882	80	88.8889
	TD06	47.6923	73.1707	81.0811	77.7778	62.963	78.7879
	TD07	45.4545	57.5758	62.5	77.2727	61.9048	55
	TD08	50	31.8182	50	78.9474	70	85.1852
	TD09	47.2222	57.6923	65.625	78.0488	79.4872	75.7576
	TD10	46.3415	43.4783	45.4545	47.3684	52.381	44.8276
	TD11	47.0588	64.2857	80	85.7143	78.5714	85.7143
	TD12	69.5652	64.2857	68.75	90	84.2105	87.5
	TD13	50	38.4615	40	25	88.2353	80.6452
	TD14	42.8571	46.1538	60	50	88.8889	83.3333
