# Supplementary material for: Acetylcholine modulates prefrontal outcome coding during threat learning under uncertainty
Source: eLife. 2025 Mar 5;13:RP102986. doi: 10.7554/eLife.102986 (PMC11882142; doi:10.7554/eLife.102986)
Supplement: Figure 5—source data 2. — Data for panel G. [file elife-102986-fig5-data2.xlsx]

## Sheet: Sheet1
Fig 5 Db	Mouse ID	T5	P1	P2	P3
ChR2	CH01	53.4884	86.4865	93.5484	100
	CH02	48.7179	78.2609	85.7143	95.6522
	CH03	51.3514	89.4737	96.6667	96.5517
	CH04	50	72.7273	92.3077	95.4545
ChrimsonR	CR01	44.1176	78.9474	90.4762	93.1034
	CR02	47.0588	93.1034	97.0588	95.4545
	CR03	48.1481	87.5	94.4444	93.75
	CR04	65.3846	81.25	90	83.3333
No opsin	TD01	48.9362	85.7143	96	100
	TD02	45	90.4762	95.4545	96
	TD03	52.7778	87.5	96.2963	100
	TD04	52.9412	66.6667	96.2963	100
	TD05	35	66.6667	81.8182	93.3333
	TD06	48.6486	64.7059	87.0968	94.7368
	TD07	61.1111	75	90.9091	100
