# Supplementary material for: Acetylcholine modulates prefrontal outcome coding during threat learning under uncertainty
Source: eLife. 2025 Mar 5;13:RP102986. doi: 10.7554/eLife.102986 (PMC11882142; doi:10.7554/eLife.102986)
Supplement: Figure 6—source data 1. — Data for panel A. [file elife-102986-fig6-data1.xlsx]

## Sheet: Sheet1
Fig 6 A Left	Mouse ID	P1	P2	P3	P4	P5		Fig 6 A middle	Mouse ID	P1	P2	P3	P4	P5		Fig 6 A right	Mouse ID	T5	P1	P2	P3	P4	P5
Opsin	CH01	100	90.9091	81.25	100	100		Opsin	CH01	60	50	25	0	20		Opsin	CH01	11.7647	17.6471	50	0	9.52381	27.2727
	CH02	100	90.9091	95.4545	92.8571	100			CH02	0	50	0	0	25			CH02	12.5	0	35	4.54545	14.2857	17.6471
	CH03	75	62.5	83.3333	87.5	70			CH03	50	66.6667	100	50	40			CH03	27.7778	50	36.3636	50	57.1429	50
	CH06	85.7143	93.75	85.7143	100	93.75			CH05	66.6667	0	0	0	0			CH04	20	66.6667	0	77.7778	100	75
	CH07	85.7143	69.2308	83.3333	87.5	80			CH06	25	20	33.3333	33.3333	66.6667			CH05	4.7619	30.4348	6.25	13.3333	5.55556	7.69231
	CH08	100	77.7778	66.6667	62.5	100			CH07	50	50	60	50	25			CH06	25	9.09091	50	16.6667	40	20
	CH09	69.2308	85.7143	70.5882	60	90.9091			CR09	25	50	25	20	60			CH07	26.3158	71.4286	50	54.5455	27.7778	25
	CH10	100	100	85.7143	78.5714	100			CR10	40	16.6667	50	50	0			CH08	40.9091	0	10	14.2857	38.8889	11.1111
	CR03	71.4286	66.6667	60	100	61.5385		No opsin	TD01	100	75	100	100	100			CH09	26.1905	0	16.6667	14.2857	30.7692	77.7778
	CR07	85.7143	100	75	100	100			TD06	50	50	66.6667	71.4286	83.3333			CH10	41.6667	50	61.1111	60	72.7273	50
No opsin	TD02	83.3333	77.7778	75	71.4286	100			TD08	0	0	60	40	100			CR01	7.14286	50	40	0	66.6667	70
	TD06	88.8889	100	100	87.5	100			TD09	0	50	85.7143	100	50			CR03	22.2222	0	0	16.6667	33.3333	33.3333
	TD07	100	71.4286	100	100	83.3333			TD12	20	100	100	66.6667	66.6667			CR07	33.3333	40	50	0	40	63.6364
	TD08	55.5556	66.6667	75	77.7778	100										No opsin	TD01	40	66.6667	91.6667	100	81.8182	93.3333
	TD09	100	100	83.3333	100	66.6667											TD02	54.5455	33.3333	30	58.8235	53.8462	76.4706
	TD10	88.8889	75	62.5	33.3333	80											TD03	20	42.8571	100	66.6667	100	100
																	TD04	37.5	33.3333	45.4545	40	88.8889	88.8889
																	TD05	38.4615	42.8571	60	57.1429	77.7778	81.8182
																	TD06	13.3333	72.7273	81.8182	80	52	66.6667
																	TD07	28.5714	14.2857	70	69.2308	33.3333	50
																	TD08	18.1818	0	50	82.6087	66.6667	75
																	TD09	25	55.5556	46.6667	73.913	63.6364	58.8235
																	TD10	0	0	0	20	66.6667	83.3333
																	TD12	53.3333	100	33.3333	83.3333	81.8182	88.8889
