# Supplementary material for: Acetylcholine modulates prefrontal outcome coding during threat learning under uncertainty
Source: eLife. 2025 Mar 5;13:RP102986. doi: 10.7554/eLife.102986 (PMC11882142; doi:10.7554/eLife.102986)
Supplement: Supplementary file 1. [file elife-102986-supp1.xlsx]

## Sheet: Sheet1
Summary of the number of imaged cells in each mouse
Group	Mouse ID	P1	P5	R5
tdTomato	M7	114	120	131
tdTomato	M10	31	26	25
tdTomato	M14	173	205	162
tdTomato	M15	28	47	63
ChrimsonR	M3	130	122	131
ChrimsonR	M4	28	20	14
ChrimsonR	M5	121	146	137
ChrimsonR	M9	22	21	16
ChrimsonR	M12	45	61	66
ChrimsonR	M13	18	20	21
